# Supplementary material for: How Should Forests Be Characterized in Regard to Human Health? Evidence from Existing Literature
Source: PubMed Central journal article supplement (PMC7038061; doi:10.3390/ijerph17031027), 2020-02-06
Supplement: ijerph-17-01027-s001.pdf [file ijerph-17-01027-s001.pdf]

**Table S1.** Overview of the analyzed articles basic information.

| <b>Authors and reference</b> | <b>Year</b> | <b>Country</b> | <b>Study type</b> | <b>Exposure type</b> | <b>Exposure time</b> | <b>N Participants</b> |
|------------------------------|-------------|----------------|-------------------|----------------------|----------------------|-----------------------|
| Bang et al. [1]              | 2017        | South Korea    | Control trial     | Passive              | Weeks                | 118                   |
| Bielinis et al. [2]          | 2019        | Poland         | Before-after      | Pro-active           | Days                 | 21                    |
| Chen et al. [3]              | 2018        | Taiwan         | Before-after      | Pro-active           | Days                 | 16                    |
| Chun et al. [4]              | 2017        | South Korea    | Control trial     | Pro-active           | Days                 | 59                    |
| Dolling et al. [5]           | 2017        | Sweden         | Comparative       | Passive              | Months               | 27                    |
| Han et al. [6]               | 2016        | South Korea    | Control trial     | Pro-active           | Days                 | 61                    |
| Hassan et al. [7]            | 2018        | China          | Control trial     | Passive              | Minutes              | 60                    |
| Horiuchi et al. [8]          | 2013        | Japan          | Comparative       | Passive              | Hours                | 48                    |
| Horiuchi et al., [9]         | 2014        | Japan          | Comparative       | Passive              | Minutes              | 15                    |
| Horiuchi et al. [10]         | 2015        | Japan          | Before-after      | Passive              | Hours                | 54                    |
| Im et al. [11]               | 2016        | South Korea    | Control trial     | Passive              | Hours                | 41                    |
| Jia et al. [12]              | 2016        | China          | Control trial     | Passive              | Days                 | 20                    |
| Joung et al. [13]            | 2015        | South Korea    | Control trial     | Passive              | Minutes              | 7                     |
| Kim, et al. [14]             | 2015        | South Korea    | Before-after      | Passive              | Days                 | 11                    |
| Kobayashi et al. [15]        | 2015        | Japan          | Control trial     | Passive              | Minutes              | 625                   |
| Kobayashi et al. [16]        | 2017        | Japan          | Control trial     | Passive              | Minutes              | 348                   |
| Lee and Lee [17]             | 2014        | South Korea    | Control trial     | Passive              | Hours                | 43                    |
| Lee et al. [18]              | 2009        | Japan          | Control trial     | Passive              | Minutes              | 12                    |
| Lee et al. [19]              | 2011        | Japan          | Control trial     | Passive              | Minutes              | 12                    |
| Lee et al. [20]              | 2014        | Japan          | Control trial     | Passive              | Minutes              | 48                    |
| Lee et al. [21]              | 2018        | South Korea    | Comparative       | Pro-active           | Hours                | 79                    |
| Li et al. [22]               | 2007        | Japan          | Before-after      | Passive              | Days                 | 12                    |
| Li et al. [23]               | 2008        | Japan          | Before-after      | Passive              | Days                 | 13                    |
| Li et al. [24]               | 2008        | Japan          | Control trial     | Passive              | Days                 | 12                    |
| Li et al. [25]               | 2011        | Japan          | Control trial     | Passive              | Days                 | 17                    |
| Li et al. [26]               | 2016        | Japan          | Control trial     | Passive              | Hours                | 19                    |
| López-Pouza et al. [27]      | 2015        | Spain          | Comparative       | Passive              | Days                 | 30                    |
| Mao et al. [28]              | 2012        | China          | Control trial     | Passive              | Days                 | 20                    |
| Mao et al. [29]              | 2012        | China          | Control trial     | Passive              | Days                 | 24                    |
| Mao et al. [30]              | 2017        | China          | Control trial     | Passive              | Days                 | 33                    |
| Mao et al. [31]              | 2018        | China          | Control trial     | Passive              | Days                 | 20                    |
| Morita et al. [32]           | 2011        | Japan          | Before-after      | Passive              | Hours                | 71                    |
| Ochiai et al. [33]           | 2015        | Japan          | Before-after      | Pro-active           | Hours                | 17                    |

|                            |      |             |               |            |         |     |
|----------------------------|------|-------------|---------------|------------|---------|-----|
| Ochiai et al. [34]         | 2015 | Japan       | Before-after  | Passive    | Hours   | 9   |
| Ohe et al. [35]            | 2017 | Japan       | Before-after  | Pro-active | Days    | 43  |
| Ohtsuka et al. [36]        | 1998 | Japan       | Before-after  | Passive    | Years   | 237 |
| Park et al. [37]           | 2007 | Japan       | Control trial | Passive    | Minutes | 12  |
| Park et al. [38]           | 2008 | Japan       | Control trial | Passive    | Minutes | 12  |
| Park et al. [39]           | 2009 | Japan       | Control trial | Passive    | Minutes | 12  |
| Park et al. [40]           | 2010 | Japan       | Control trial | Passive    | Minutes | 280 |
| Saito et al. [41]          | 2019 | Japan       | Comparative   | Passive    | Minutes | 17  |
| Seo et al. [42]            | 2015 | South Korea | Before-after  | Pro-active | Days    | 48  |
| Shin and Choi [43]         | 2019 | South Korea | Control trial | Passive    | Minutes | 10  |
| Song et al. [44]           | 2013 | Japan       | Control trial | Passive    | Minutes | 485 |
| Song et al. [45]           | 2015 | Japan       | Control trial | Passive    | Minutes | 20  |
| Song et al. [46]           | 2015 | Japan       | Control trial | Passive    | Minutes | 92  |
| Song et al. [47]           | 2017 | Japan       | Before-after  | Pro-active | Days    | 26  |
| Song et al. [48]           | 2017 | Japan       | Control trial | Passive    | Minutes | 20  |
| Song et al. [49]           | 2019 | China       | Control trial | Passive    | Minutes | 60  |
| Sonntag-Oström et al. [50] | 2014 | Sweden      | Control trial | Passive    | Minutes | 20  |
| Sonntag-Oström et al. [51] | 2015 | Sweden      | Control trial | Pro-active | Days    | 86  |
| Stigsdotter et al. [52]    | 2017 | Denmark     | Control trial | Passive    | Minutes | 51  |
| Sung et al. [53]           | 2012 | South Korea | Control trial | Pro-active | Days    | 56  |
| Toda and Takeshita [54]    | 2015 | Japan       | Control trial | Passive    | Minutes | 20  |
| Toda et al. [55]           | 2013 | Japan       | Control trial | Passive    | Minutes | 20  |
| Tsao et al. [56]           | 2018 | Taiwan      | Control trial | Passive    | Days    | 11  |
| Tsunetsugu et al. [57]     | 2007 | Japan       | Control trial | Passive    | Minutes | 12  |
| Wang et al. [58]           | 2018 | Japan       | Control trial | Passive    | Hours   | 28  |
| Wu et al. [59]             | 2017 | China       | Control trial | Passive    | Days    | 33  |
| Yamaguchi et al. [60]      | 2006 | Japan       | Control trial | Passive    | Days    | 10  |
| Yu et al. [61]             | 2016 | South Korea | Before-after  | Pro-active | Days    | 24  |
| Yu et al. [62]             | 2017 | Taiwan      | Before-after  | Pro-active | Hours   | 128 |

**Table S2.** Health variables registered in the articles analysis classified by systems or functions.

| <b>Endocrine/reproductive</b>                                                        |
|--------------------------------------------------------------------------------------|
| Glucose (serum concentration)                                                        |
| Glycated hemoglobin (HbA1C)                                                          |
| Insulin                                                                              |
| Adiponectin                                                                          |
| Estradiol                                                                            |
| Progesterone                                                                         |
| Dehydroepiandrosterone sulfate (DHEA-S)                                              |
| <b>Cardiovascular</b>                                                                |
| Diastolic blood pressure (DBP)                                                       |
| Systolic blood pressure (SBP)                                                        |
| Pulse pressure (SBP-DBP)                                                             |
| Cardio-ankle vascular index (CAVI)                                                   |
| Heart rate variability (HRV)                                                         |
| Mean heart rate (HR)                                                                 |
| Standard deviation of normal to normal beat interval (SDNN)                          |
| High-frequency (HF) band                                                             |
| Low-frequency (LF) band                                                              |
| LF/HF ratio.                                                                         |
| Homocysteine (HCY)                                                                   |
| Renin-angiotensin system                                                             |
| Angiotensin II receptor type 1 (AT1)                                                 |
| Angiotensin II receptor type 1 (AT2)                                                 |
| Angiotensinogen (AGT)                                                                |
| Renin                                                                                |
| Angiotensin (ANG)                                                                    |
| Endothelin-1 (ET-1)                                                                  |
| Brain natriuretic peptide (BNP)                                                      |
| Cerebral oxygenated hemoglobin (HbO <sub>2</sub> ) and deoxygenated hemoglobin (HHb) |
| N-terminal pro-B-type natriuretic peptide (NT-proBNP) (serum concentration)          |
| <b>Metabolic</b>                                                                     |
| Body fat                                                                             |
| Low-density lipoprotein (LDL) cholesterol                                            |
| High-density lipoprotein (HDL) cholesterol                                           |
| Remnant-like particle (RLP) cholesterol                                              |
| Stress                                                                               |
| Cortisol (serum, saliva)                                                             |
| Chromogranin-A (CgA) (saliva)                                                        |
| Adrenaline (urinary, blood)                                                          |
| Noradrenaline                                                                        |
| Salivary amylase (sAMY) activity (and its natural logarithm, log <sub>e</sub> sAMY). |
| Oxidative stress/carcinogenesis                                                      |
| Hydroperoxides (reactive oxygen metabolites of the d-ROM test)                       |
| Hydrogen peroxide (H <sub>2</sub> O <sub>2</sub> )                                   |
| 8-hydroxy-2'-deoxyguanosine (8-OHdG)                                                 |
| Malondialdehyde (MDA)                                                                |
| Superoxide dismutases (SODs) (total in serum)                                        |
| Tissue inhibitor of metalloproteinase (TIMP-1) (serum concentration)                 |
| <b>Nervous</b>                                                                       |
| Noradrenaline                                                                        |
| Dopamine                                                                             |
| Sleep quality assessment                                                             |

---

Total time in bed  
Sleep latency  
Total sleep duration  
Actual sleep  
Immobile minutes  
Sleep efficiency  
Brain bioelectrical activity  
    Beta waves  
Cerebral oxygenated hemoglobin (HbO<sub>2</sub>) and deoxygenated hemoglobin (HHb)  
Necker cube pattern control task (spontaneous reversals and focused reversals)

---

#### **Respiratory**

---

Forced vital capacity (FVC)  
Forced expiratory volume in the first second (FEV1)  
Forced expiratory volume in six seconds (FEV6)  
Fractional exhaled nitric oxide (FeNO)  
Pulmonary and activation-regulated chemokine/CC-chemokine ligand-18 (PARC/CCL18) (serum concentration)  
Surfactant protein D (SP-D) (serum concentration)

---

#### **Hematological/immunological/inflammatory**

---

Red blood cell (RBC) count  
Hemoglobin (Hb) (total)  
Platelet count  
White blood cell (WBC) count  
CD8+ cells (proportion)  
Natural killer (NK) cell count (total) and activity (proportion of activating NK cells)  
NK T-like cells (proportion)  
T cells (proportion)  
Perforin production (total and proportion in CD8+ cells and NK cells)  
Granulysin (GRN) (total and proportion)  
Granzyme A and B (GrA/B) production in peripheral blood lymphocytes (PBL) and specifically in CD8+, NK and NKT-like cells (total and proportion)  
Granulocytes (proportion)  
Monocytes (proportion)  
Macrophages (proportion)  
Lymphocytes (proportion)  
Interleukin-6 (IL-6)  
Interleukin-8 (IL8)  
Interferon- $\gamma$  (IFN- $\gamma$ )  
Interleukin-1 $\beta$  (IL-1 $\beta$ )  
C-reactive protein (CRP)  
Tumor necrosis factor  $\alpha$  (TNF- $\alpha$ )  
Secretory immunoglobulin A (s-IgA) (saliva concentration)  
Thymus and activation-regulated chemokine (TARC/CCL17)  
Macrophage-derived chemokine (MDC/CCL22)

---

#### **Musculoskeletal**

---

Bone density

---

## Supplementary references

1. Bang, K.S.; Lee, I.; Kim, S.; Lim, C.S.; Joh, H.K.; Park, B.J.; Song, M.K. The effects of a campus Forest-Walking program on undergraduate and graduate students' physical and psychological health. *Int. J. Environ. Res. Public Health* **2017**, *14*.
2. Bielinis, E.; Bielinis, L.; Krupińska-Szeluga, S.; Łukowski, A.; Takayama, N. The Effects of a Short Forest Recreation Program on Physiological and Psychological Relaxation in Young Polish Adults. *Forests* **2019**, *10*, 34.
3. Chen, H.T.; Yu, C.P.; Lee, H.Y. The effects of forest bathing on stress recovery: Evidence from middle-aged females of Taiwan. *Forests* **2018**, *8*, 1–9.
4. Chun, M.H.; Chang, M.C.; Lee, S.J. The effects of forest therapy on depression and anxiety in patients with chronic stroke. *Int. J. Neurosci.* **2017**, *127*, 199–203.
5. Dolling, A.; Nilsson, H.; Lundell, Y. Stress recovery in forest or handicraft environments – An intervention study. *Urban For. Urban Green.* **2017**, *27*, 162–172.
6. Han, J.-W.; Choi, H.; Jeon, Y.-H.; Yoon, C.-H.; Woo, J.-M.; Kim, W. The Effects of Forest Therapy on Coping with Chronic Widespread Pain: Physiological and Psychological Differences between Participants in a Forest Therapy Program and a Control Group. *Int. J. Environ. Res. Public Health* **2016**, *13*, 255.
7. Hassan, A.; Tao, J.; Li, G.; Jiang, M.; Aii, L.; Zhihui, J.; Zongfang, L.; Qibing, C. Effects of Walking in Bamboo Forest and City Environments on Brainwave Activity in Young Adults. *Evidence-Based Complement. Altern. Med.* **2018**, *2018*, 1–9.
8. Horiuchi, M.; Endo, J.; Akatsuka, S.; Uno, T.; Hasegawa, T. Influence of Forest Walking on Blood Pressure, Profile of Mood States and Stress Markers from the Viewpoint of Aging. *J. Aging Gerontol.* **2013**, *1*, 9–17.
9. Horiuchi, M.; Endo, J.; Takayama, N.; Murase, K.; Nishiyama, N.; Saito, H.; Fujiwara, A. Impact of viewing vs. Not viewing a real forest on physiological and psychological responses in the same setting. *Int. J. Environ. Res. Public Health* **2014**, *11*, 10883–10901.
10. Horiuchi, M.; Junko, E.; Akatsuka, S.; Hasegawa, T.; Yamamoto, E.; Uno, T.; Kikuchi, S. An effective strategy to reduce blood pressure after forest walking in middle-aged and aged people. *J. Phys. Ther. Sci.* **2015**, *27*, 3711–3716.
11. Im, S.G.; Choi, H.; Jeon, Y.H.; Song, M.K.; Kim, W.; Woo, J.M. Comparison of effect of two-hour exposure to forest and urban environments on cytokine, anti-oxidant, and stress levels in young adults. *Int. J. Environ. Res. Public Health* **2016**, *13*.
12. Jia, B.B.; Yang, Z.X.; Mao, G.X.; Lyu, Y.D.; Wen, X.L.; Xu, W.H.; Lyu, X.L.; Cao, Y.B.; Wang, G.F. Health Effect of Forest Bathing Trip on Elderly Patients with Chronic Obstructive Pulmonary Disease. *Biomed. Environ. Sci.* **2016**, *29*, 212–218.
13. Joung, D.; Kim, G.; Choi, Y.; Lim, H.; Park, S.; Woo, J.M.; Park, B.J. The prefrontal cortex activity and psychological effects of viewing forest landscapes in Autumn season. *Int. J. Environ. Res. Public Health* **2015**, *12*, 7235–7243.
14. Kim, B.J.; Jeong, H.; Park, S.; Lee, S. Forest adjuvant anti-cancer therapy to enhance natural cytotoxicity in urban women with breast cancer: A preliminary prospective interventional study. *Eur. J. Integr. Med.* **2015**, *7*, 474–478.
15. Kobayashi, H.; Song, C.; Ikei, H.; Kagawa, T.; Miyazaki, Y. Analysis of Individual Variations in Autonomic Responses to Urban and Forest Environments. *Evidence-Based Complement. Altern. Med.* **2015**, *2015*, 1–7.
16. Kobayashi, H.; Song, C.; Ikei, H.; Park, B.J.; Lee, J.; Kagawa, T.; Miyazaki, Y. Population-based study on the effect of a forest environment on salivary cortisol concentration. *Int. J. Environ. Res. Public Health* **2017**, *14*.
17. Lee, J.Y.; Lee, D.C. Cardiac and pulmonary benefits of forest walking versus city walking in elderly women: A randomised, controlled, open-label trial. *Eur. J. Integr. Med.* **2014**, *6*, 5–11.
18. Lee, J.; Park, B.J.; Tsunetsugu, Y.; Kagawa, T.; Miyazaki, Y. Restorative effects of viewing real forest landscapes, based on a comparison with urban landscapes. *Scand. J. For. Res.* **2009**, *24*, 227–234.
19. Lee, J.; Park, B.J.; Tsunetsugu, Y.; Ohira, T.; Kagawa, T.; Miyazaki, Y. Effect of forest bathing on physiological and psychological responses in young Japanese male subjects. *Public Health* **2011**, *125*,

20. Lee, J.; Tsunetsugu, Y.; Takayama, N.; Park, B.-J.; Li, Q.; Song, C.; Komatsu, M.; Ikei, H.; Tyrväinen, L.; Kagawa, T.; et al. Influence of Forest Therapy on Cardiovascular Relaxation in Young Adults. *Evidence-Based Complement. Altern. Med.* **2014**, *2014*, 1–7.
21. Lee, K.J.; Hur, J.; Yang, K.S.; Lee, M.K.; Lee, S.J. Acute Biophysical Responses and Psychological Effects of Different Types of Forests in Patients With Metabolic Syndrome. *Environ. Behav.* **2018**, *50*, 298–323.
22. Li, Q.; Morimoto, K.; Nakadai, A.; Inagaki, H.; Katsumata, M.; Shimizu, T.; Hirata, Y.; Hirata, K.; Suzuki, H.; Miyazaki, T.; et al. Forest Bathing Enhances Human Natural Killer Activity and Expression of Anti-Cancer Proteins. *Int. J. Immunopathol. Pharmacol.* **2007**, *20*, 3–8.
23. Li, Q.; Morimoto, K.; Kobayashi, M.; Inagaki, H.; Katsumata, M.; Hirata, Y.; Hirata, K.; Shimizu, T.; Li, Y.J.; Wakayama, T.; et al. A forest bathing trip increases human natural killer activity and expression of anti-cancer proteins in female subjects. *J. Biol. Regul. Homeost. Agents* **2008**, *22*.
24. Li, Q.; Morimoto, K.I.; Kobayashi, M.; Inagaki, H.; Katsumata, M.; Hirata, Y.; Hirata, K.; Suzuki, H.; Li, Y.; Wakayama, Y.; et al. VISITING A FOREST, BUT NOT A CITY, INCREASES HUMAN NATURAL KILLER ACTIVITY AND EXPRESSION OF ANTI-CANCER PROTEINS. *Int. J. Immunopathol. Pharmacol.* **2008**, *21*, 117–127.
25. Li, Q.; Otsuka, T.; Kobayashi, M.; Wakayama, Y.; Inagaki, H.; Katsumata, M.; Hirata, Y.; Li, Y.; Hirata, K.; Shimizu, T.; et al. Acute effects of walking in forest environments on cardiovascular and metabolic parameters. *Eur. J. Appl. Physiol.* **2011**, *111*, 2845–2853.
26. Li, Q.; Otsuka, T.; Kobayashi, M.; Wakayama, Y.; Inagaki, H.; Katsumata, M.; Hirata, Y.; Li, Y.; Hirata, K.; Shimizu, T.; et al. Effects of forest environments on cardiovascular and metabolic parameters. *Evidence-Based Complement. Altern. Med.* **2016**, *Volume 201*, 1–7.
27. López-Pousa, S.; Bassets Pagès, G.; Monserrat-Vila, S.; de Gracia Blanco, M.; Hidalgo Colomé, J.; Garre-Olmo, J. Sense of Well-Being in Patients with Fibromyalgia: Aerobic Exercise Program in a Mature Forest—A Pilot Study. *Evidence-Based Complement. Altern. Med.* **2015**, *2015*, 1–9.
28. Mao, G.X.; Lan, X.G.; Cao, Y.B.; Chen, Z.M.; He, Z.H.; LV, Y.D.; Wang, Y.Z.; Hu, X.L.; Wang, G.F.; Yan, J. Effects of Short-Term Forest Bathing on Human Health in a Broad-Leaved Evergreen Forest in Zhejiang Province, China. *Biomed. Environ. Sci.* **2012**, *25*, 317–324.
29. Mao, G.-X.; Cao, Y.-B.; Lan, X.-G.; He, Z.-H.; Chen, Z.-M.; Wang, Y.-Z.; Hu, X.-L.; Lv, Y.-D.; Wang, G.-F.; Yan, J. Therapeutic effect of forest bathing on human hypertension in the elderly. *J. Cardiol.* **2012**, *60*, 495–502.
30. Mao, G.; Cao, Y.; Wang, B.; Wang, S.; Chen, Z.; Wang, J.; Xing, W.; Ren, X.; Lv, X.; Dong, J.; et al. The salutary influence of forest bathing on elderly patients with chronic heart failure. *Int. J. Environ. Res. Public Health* **2017**, *14*.
31. Mao, G.X.; Cao, B.Y.; Yang, Y.; Chen, Z.M.; Dong, J.H.; Chen, S.S.; Wu, Q.; Lyu, X.L.; Jia, B.B.; Yan, J.; et al. Additive Benefits of Twice Forest Bathing Trips in Elderly Patients with Chronic Heart Failure. *Biomed. Environ. Sci.* **2018**, *31*, 159+.
32. Morita, E.; Imai, M.; Okawa, M.; Miyaura, T.; Miyazaki, S. A before and after comparison of the effects of forest walking on the sleep of a community-based sample of people with sleep complaints. *Biopsychosoc. Med.* **2011**, *5*, 13.
33. Ochiai, H.; Ikei, H.; Song, C.; Kobayashi, M.; Miura, T.; Kagawa, T.; Li, Q.; Kumeda, S.; Imai, M.; Miyazaki, Y. Physiological and psychological effects of a forest therapy program on middle-aged females. *Int. J. Environ. Res. Public Health* **2015**, *12*, 15222–15232.
34. Ochiai, H.; Ikei, H.; Song, C.; Kobayashi, M.; Takamatsu, A.; Miura, T.; Kagawa, T.; Li, Q.; Kumeda, S.; Imai, M.; et al. Physiological and psychological effects of forest therapy on middle-aged males with high-normal blood pressure. *Int. J. Environ. Res. Public Health* **2015**, *12*, 2532–2542.
35. Ohe, Y.; Ikei, H.; Song, C.; Miyazaki, Y. Evaluating the relaxation effects of emerging forest-therapy tourism: A multidisciplinary approach. *Tour. Manag.* **2017**.
36. Ohtsuka, Y.; Yabunaka, N.; Takayama, S. Shinrin-yoku (forest-air bathing and walking) effectively decreases blood glucose levels in diabetic patients. *Int. J. Biometeorol.* **1998**, *41*, 125–127.
37. Park, B.J.; Tsunetsugu, Y.; Kasetani, T.; Hirano, H.; Kagawa, T.; Sato, M.; Miyazaki, Y. Physiological effects of Shinrin-yoku (taking in the atmosphere of the forest) using salivary cortisol and cerebral activity as indicators. *J. Physiol. Anthropol.* **2007**, *26*, 123–128.

38. Park, B.J.; Tsunetsugu, Y.; Ishii, H.; Furuhashi, S.; Hirano, H.; Kagawa, T.; Miyazaki, Y. Physiological effects of Shinrin-yoku (taking in the atmosphere of the forest) in a mixed forest in Shinano Town, Japan. *Scand. J. For. Res.* **2008**, *23*.
39. Park, B.J.; Tsunetsugu, Y.; Kasetani, T.; Morikawa, T.; Kagawa, T.; Miyazaki, Y. Physiological effects of forest recreation in a young conifer forest in Hinokage Town, Japan. *Silva Fenn.* **2009**, *43*, 291–301.
40. Park, B.J.; Tsunetsugu, Y.; Kasetani, T.; Kagawa, T.; Miyazaki, Y. The physiological effects of Shinrin-yoku (taking in the forest atmosphere or forest bathing): Evidence from field experiments in 24 forests across Japan. *Environ. Health Prev. Med.* **2010**, *15*, 18–26.
41. Saito, H.; Horiuchi, M.; Takayama, N.; Fujiwara, A. Effects of managed forest versus unmanaged forest on physiological restoration from a stress stimulus, and the relationship with individual traits. *J. For. Res.* **2019**, *24*, 77–85.
42. Seo, S.C.; Park, S.J.; Park, C.-W.; Yoon, W.-S.; Choung, J.T.; Yoo, Y. Clinical and immunological effects of a forest trip in children with asthma and atopic dermatitis. *Iran. J. Allergy, Asthma Immunol.* **2015**, *14*, 28–36.
43. Shin, J.-W.; Choi, J.-H. The Effects of Single Session Forest Walking on Physiological and Psychological State of Myocardial Infarction Patients. *J. People, Plants, Environ.* **2019**, *22*, 109–118.
44. Song, C.; Ikei, H.; Lee, J.; Park, B.-J.; Kagawa, T.; Miyazaki, Y. Individual differences in the physiological effects of forest therapy based on Type A and Type B behavior patterns. *J. Physiol. Anthropol.* **2013**, *32*, 14.
45. Song, C.; Ikei, H.; Kobayashi, M.; Miura, T.; Taue, M.; Kagawa, T.; Li, Q.; Kumeda, S.; Imai, M.; Miyazaki, Y. Effect of forest walking on autonomic nervous system activity in middle-aged hypertensive individuals: A pilot study. *Int. J. Environ. Res. Public Health* **2015**, *12*, 2687–2699.
46. Song, C.; Ikei, H.; Miyazaki, Y. Elucidation of a physiological adjustment effect in a forest environment: A pilot study. *Int. J. Environ. Res. Public Health* **2015**, *12*, 4247–4255.
47. Song, C.; Ikei, H.; Miyazaki, Y. Sustained effects of a forest therapy program on the blood pressure of office workers. *Urban For. Urban Green.* **2017**, *27*, 246–252.
48. Song, C.; Ikei, H.; Kobayashi, M.; Miura, T.; Li, Q.; Kagawa, T.; Kumeda, S.; Imai, M.; Miyazaki, Y. Effects of viewing forest landscape on middle-aged hypertensive men. *Urban For. Urban Green.* **2017**, *21*, 247–252.
49. Song, C.; Ikei, H.; Kagawa, T.; Miyazaki, Y. Effects of Walking in a Forest on Young Women. *Int. J. Environ. Res. Public Health* **2019**, *16*, 229.
50. Sonntag-Öström, E.; Nordin, M.; Lundell, Y.; Dolling, A.; Wiklund, U.; Karlsson, M.; Carlberg, B.; Slunga Järholm, L. Restorative effects of visits to urban and forest environments in patients with exhaustion disorder. *Urban For. Urban Green.* **2014**, *13*, 344–354.
51. Sonntag-Öström, E.; Nordin, M.; Dolling, A.; Lundell, Y.; Nilsson, L.; Slunga Järholm, L. Can rehabilitation in boreal forests help recovery from exhaustion disorder? The randomised clinical trial ForRest. *Scand. J. For. Res.* **2015**, *30*, 732–748.
52. Stigsdotter, U.K.; Corazon, S.S.; Sidenius, U.; Kristiansen, J.; Grahn, P. It is not all bad for the grey city – A crossover study on physiological and psychological restoration in a forest and an urban environment. *Heal. Place* **2017**, *46*, 145–154.
53. Sung, J.; Woo, J.M.; Kim, W.; Lim, S.K.; Chung, E.J. The effect of cognitive behavior therapy-based “forest therapy” program on blood pressure, salivary cortisol level, and quality of life in elderly hypertensive patients. *Clin. Exp. Hypertens.* **2012**, *34*, 1–7.
54. Toda, M.; Takeshita, T. The influence of personal patterns of behavior on the physiological effects of woodland walking. *Adv Mind Body Med* **2015**, *29*, 14–18.
55. Toda, M.; Den, R.; Hasegawa-Ohira, M.; Morimoto, K. Effects of woodland walking on salivary stress markers cortisol and chromogranin A. *Complement. Ther. Med.* **2013**, *21*, 29–34.
56. Tsao, T.-M.; Tsai, M.-J.; Hwang, J.-S.; Cheng, W.-F.; Wu, C.-F.; Chou, C.-C.; Su, T.-C. Health effects of a forest environment on natural killer cells in humans: An observational pilot study. *Oncotarget* **2018**, *9*, 16501–16511.
57. Tsunetsugu, Y.; Park, B.-J.; Ishii, H.; Hirano, H.; Kagawa, T.; Miyazaki, Y. Physiological Effects of Shinrin-yoku (Taking in the Atmosphere of the Forest) in an Old-Growth Broadleaf Forest in Yamagata Prefecture, Japan. *J. Physiol. Anthropol.* **2007**, *26*, 135–142.

58. Wang, D.H.; Yamada, A.; Miyanaga, M. Changes in urinary hydrogen peroxide and 8-hydroxy-2'-deoxyguanosine levels after a forest walk: A pilot study. *Int. J. Environ. Res. Public Health* **2018**, *15*.
59. Wu, Q.; Cao, Y.; Mao, G.; Wang, S.; Fang, Y.; Tong, Q.; Huang, Q.; Wang, B.; Yan, J.; Wang, G. Effects of forest bathing on plasma endothelin-1 in elderly patients with chronic heart failure: Implications for adjunctive therapy. *Geriatr. Gerontol. Int.* **2017**, *17*, 2627–2629.
60. Yamaguchi, M.; Deguchi, M.; Miyazaki, Y. The Effects of Exercise in Forest and Urban Environments on Sympathetic Nervous Activity of Normal Young Adults. *J. Int. Med. Res.* **2006**, *34*, 152–159.
61. Yu, Y.M.; Lee, Y.J.; Kim, J.Y.; Yoon, S.B.; Shin, C.S. Effects of forest therapy camp on quality of life and stress in postmenopausal women. *Forest Sci. Technol.* **2016**, *12*, 125–129.
62. Yu, C.P.; Lin, C.M.; Tsai, M.J.; Tsai, Y.C.; Chen, C.Y. Effects of short forest bathing program on autonomic nervous system activity and mood states in middle-aged and elderly individuals. *Int. J. Environ. Res. Public Health* **2017**, *14*.
